# Supplementary material for: Amyloid-like peptide nanofiber templated titania nanostructures as dye sensitized solar cell anodic materials
Source: Royal Society of Chemistry journal article supplement (doi:10.1039/c3ta11542a), 2013-01-01
Supplement: c3ta11542a.pdf [file c3ta11542a.pdf]

## Supporting Information

for

# Amyloid-Like Peptide Nanofiber Templated Titania Nanostructures as Dye Sensitized Solar Cell Anodic Materials

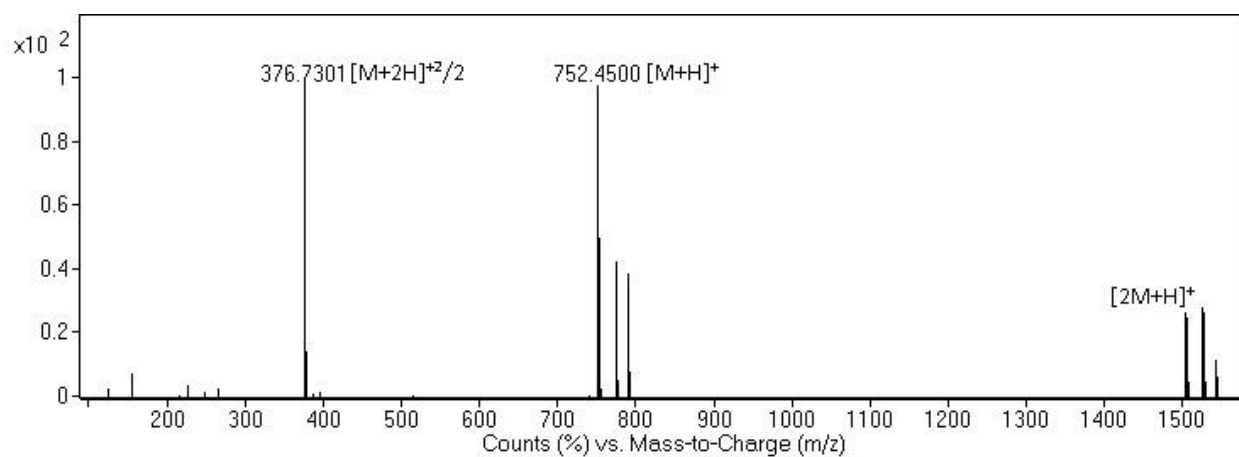

**Figure S1.** Mass spectrum of Ac-KFFAAK-Am (Peptide-1) molecule. MS: (m/z) calculated 751.4381,  $[M+H]^+$  found 752.4500,  $[M+2H]^{+2}/2$  found 376.7301.

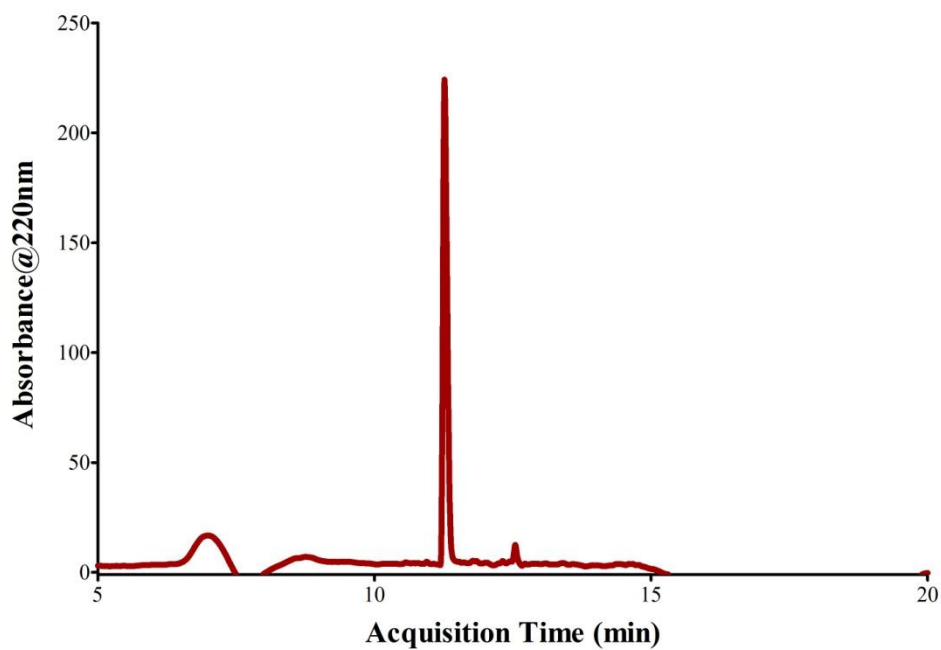

**Figure S2.** Liquid chromatogram of Ac-KFFAAK-Am peptide.

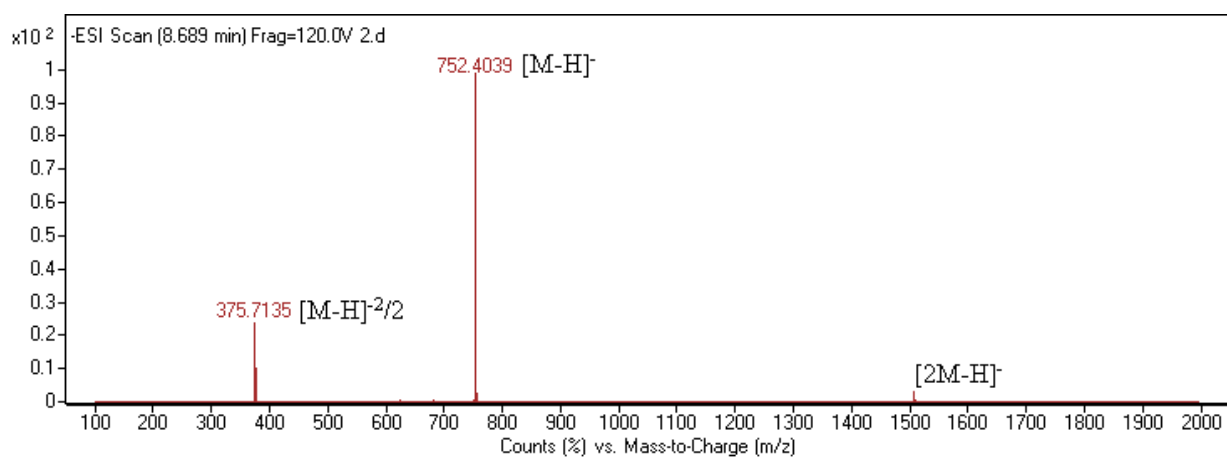

**Figure S3.** Mass spectrum of Ac-EFFAAE-Am (Peptide-2) molecule. MS: ( $m/z$ ) calculated

753.3334,  $[M-H]^{-}$  found 752.4039,  $[M-2H]^{-2}/2$  found 375.7135.

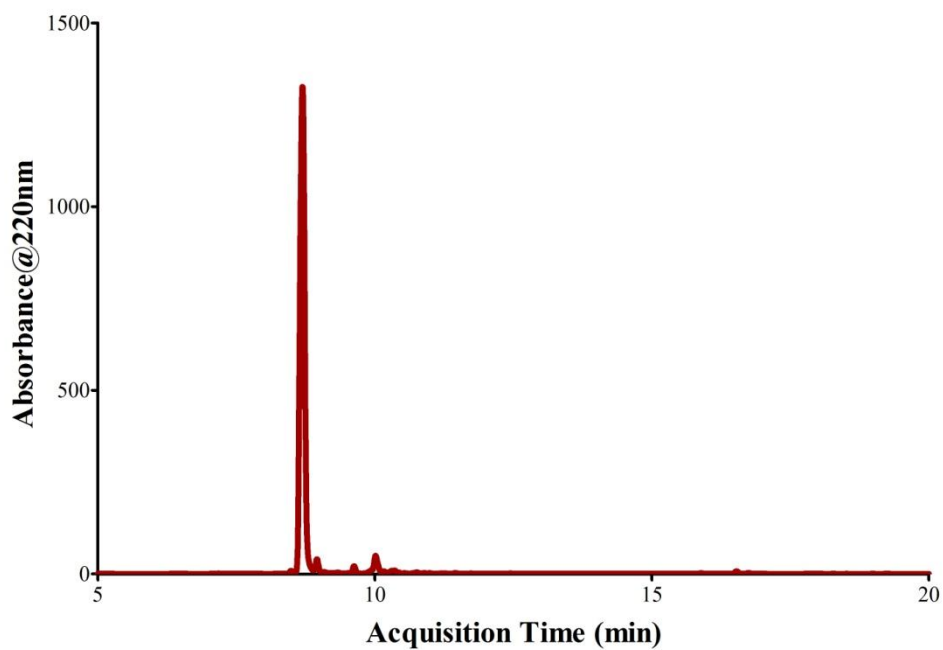

*Figure S4. Liquid chromatogram of Ac-EFFAAE-Am peptide.*

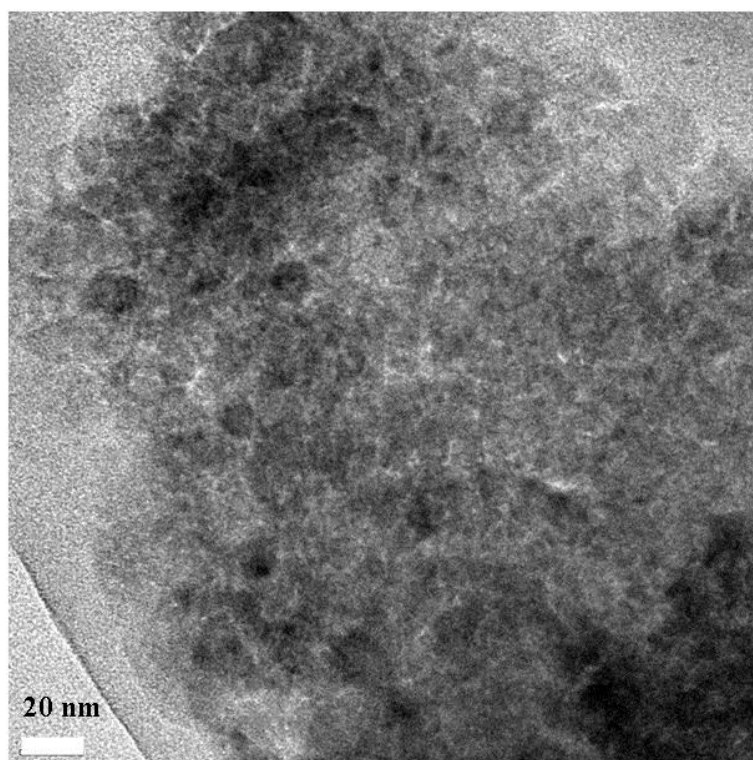

*Figure S4. TEM image of template-free synthesized titania.*

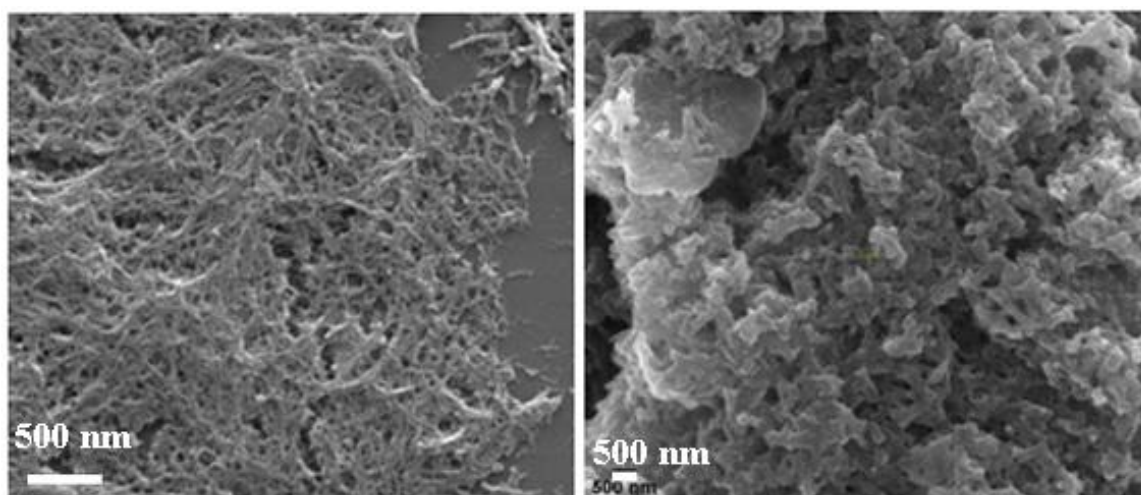

**Figure S5.** SEM images of calcined one-dimensional titania structures on FTO. a) Peptide 1 templated titania nanotube network, b) peptide 2 templated nanowire network.

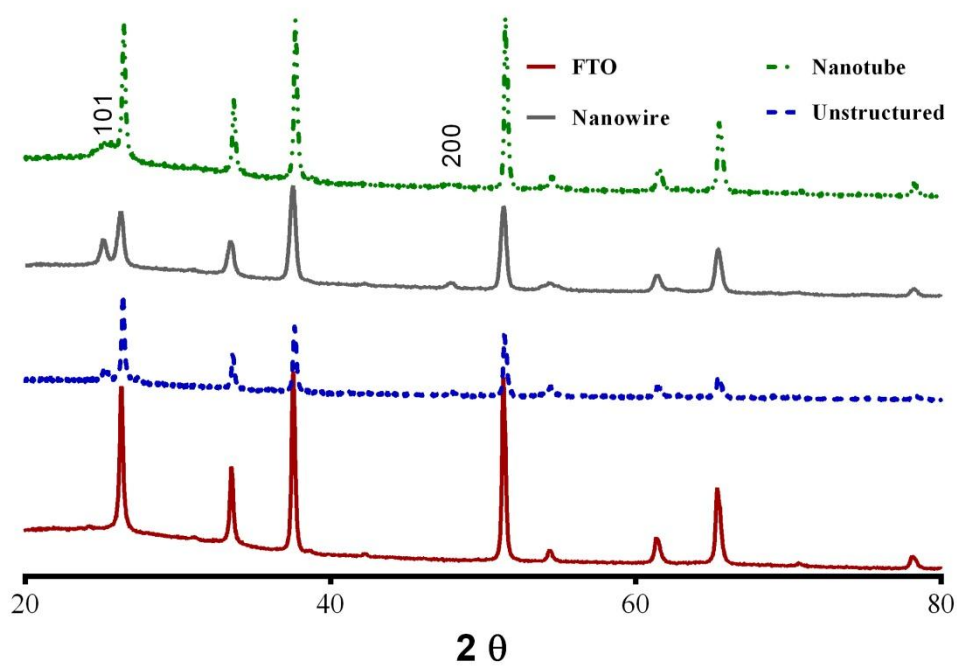

**Figure S6.** XRD spectra of template-free  $\text{TiO}_2$  (blue), peptide 1 templated  $\text{TiO}_2$  (green), peptide 2 templated  $\text{TiO}_2$  (grey) on FTO and FTO only (red).

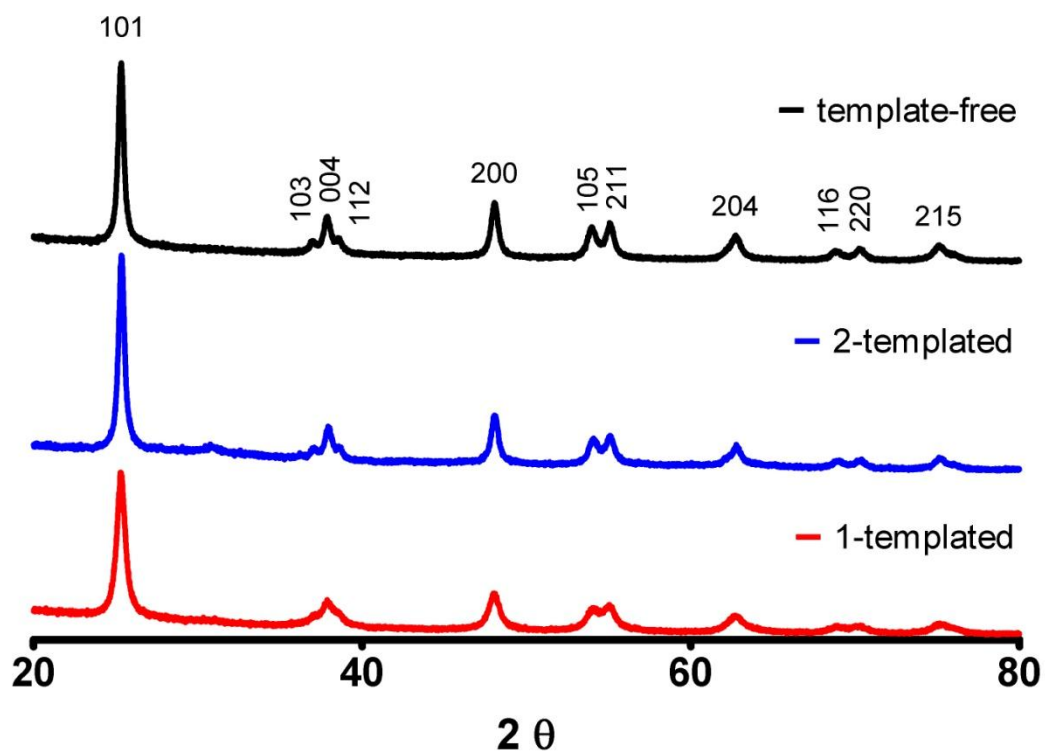

**Figure S8.** XRD spectra of template-free TiO<sub>2</sub> (black), peptide 1 templated TiO<sub>2</sub> (blue), peptide 2 templated TiO<sub>2</sub> (red) powders.

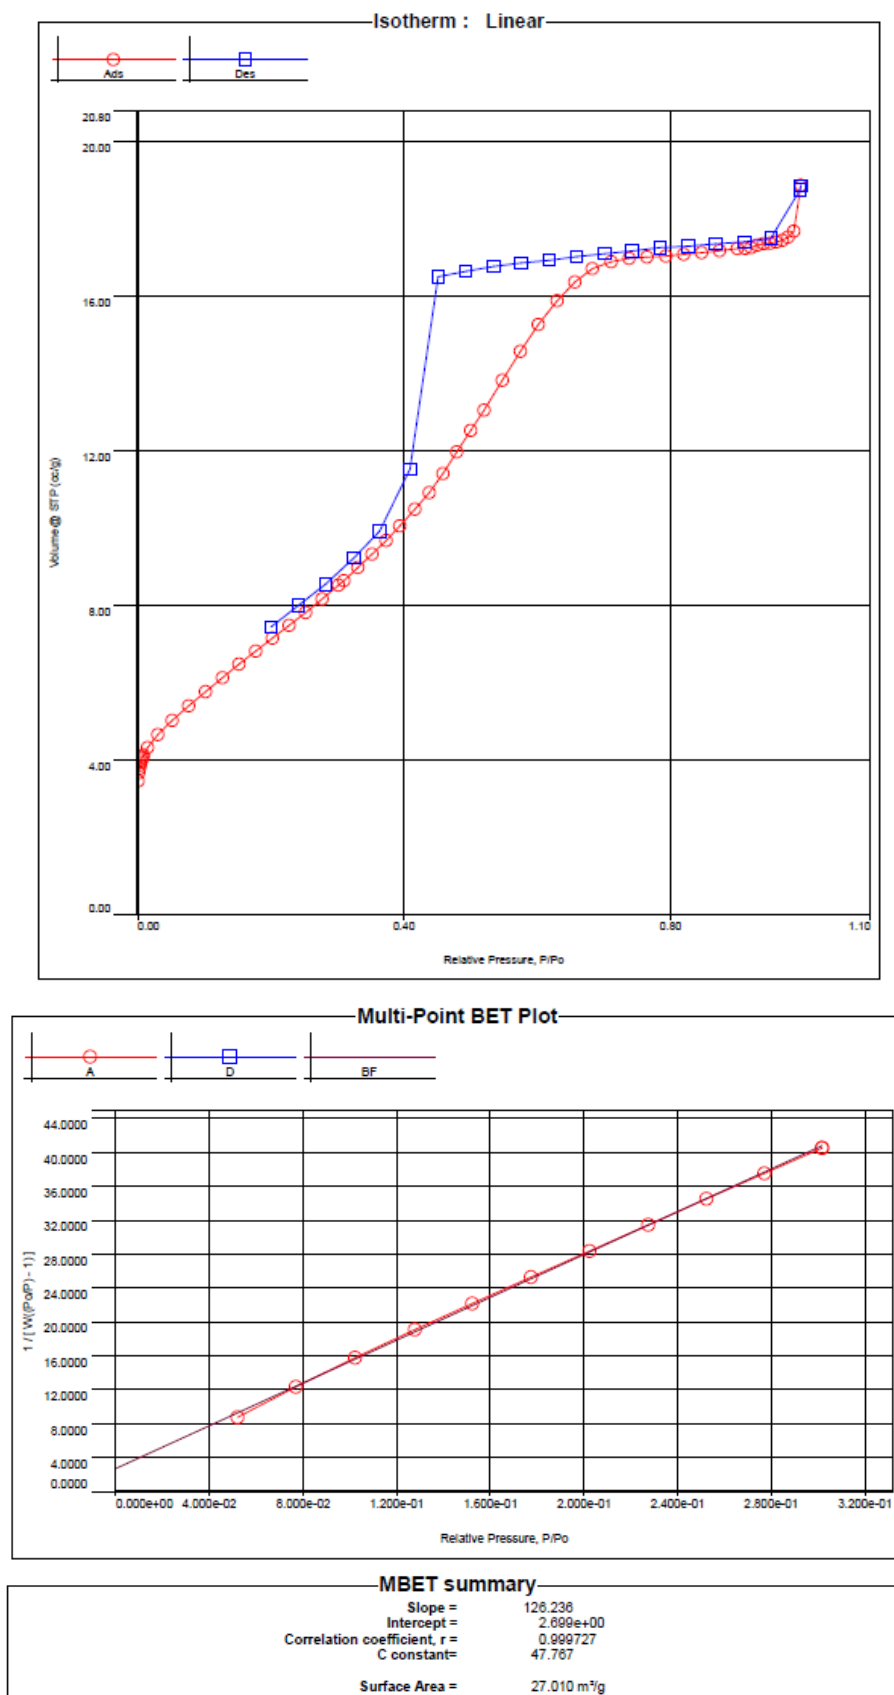

**Figure S9.** a) The isothermal histogram and, b) Multi-Point BET analysis based on the histogram of template-free TiO<sub>2</sub>.

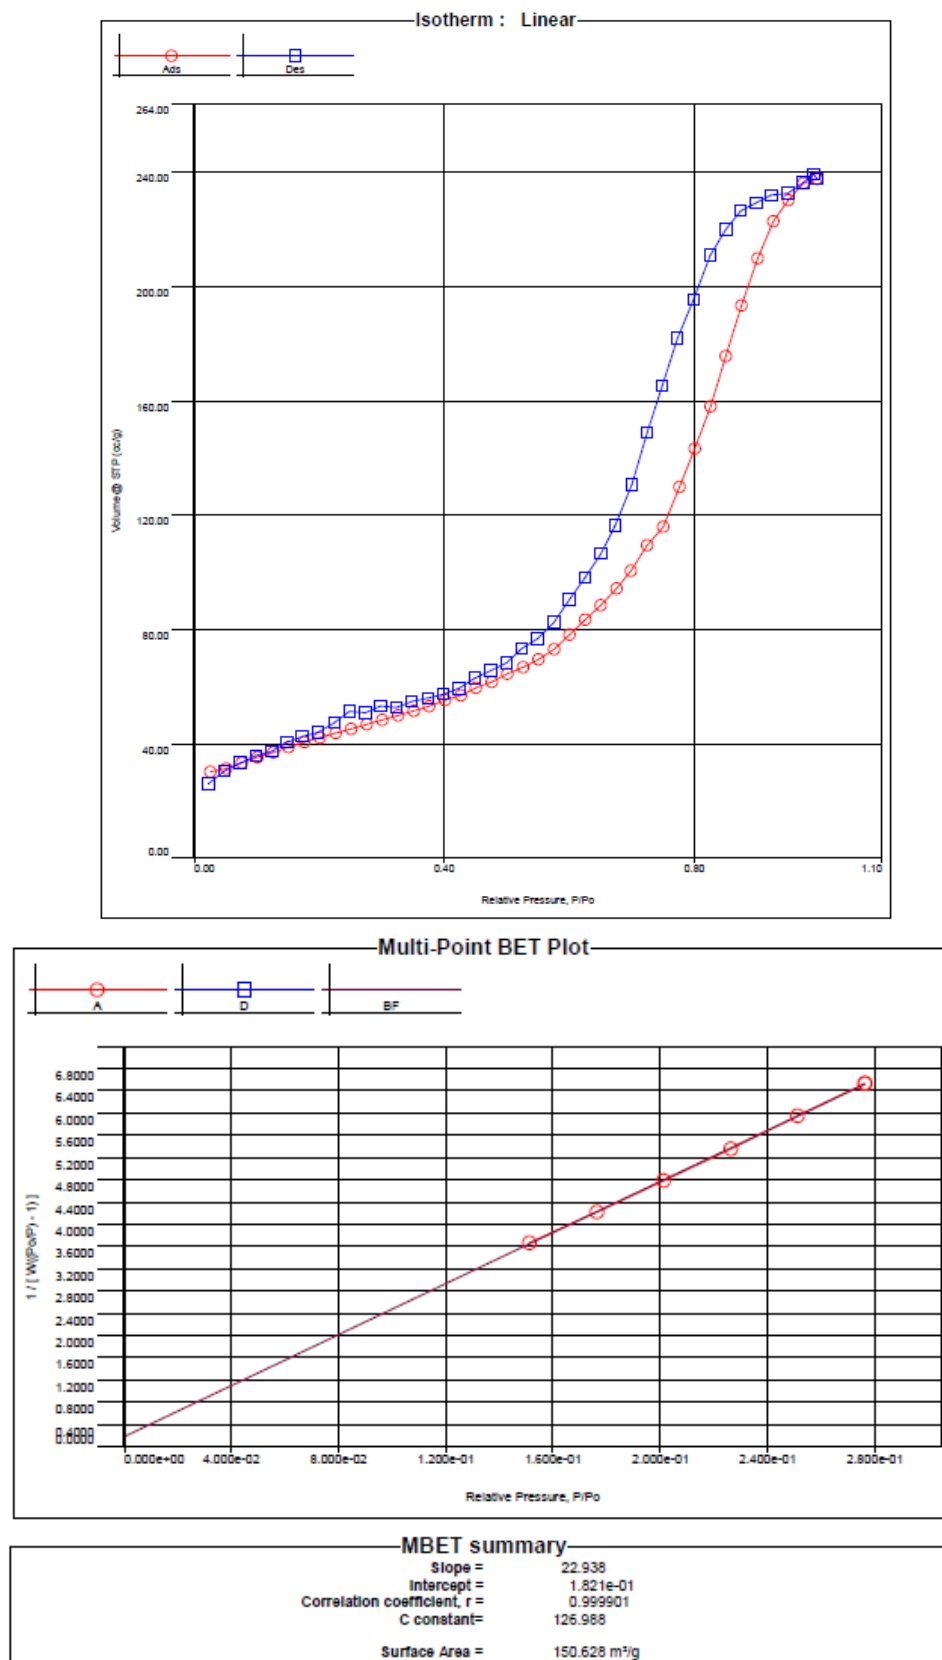

**Figure S10.** a) The isothermal histogram and, b) Multi-Point BET analysis based on the histogram of peptide1 templated TiO<sub>2</sub> nanotube network.

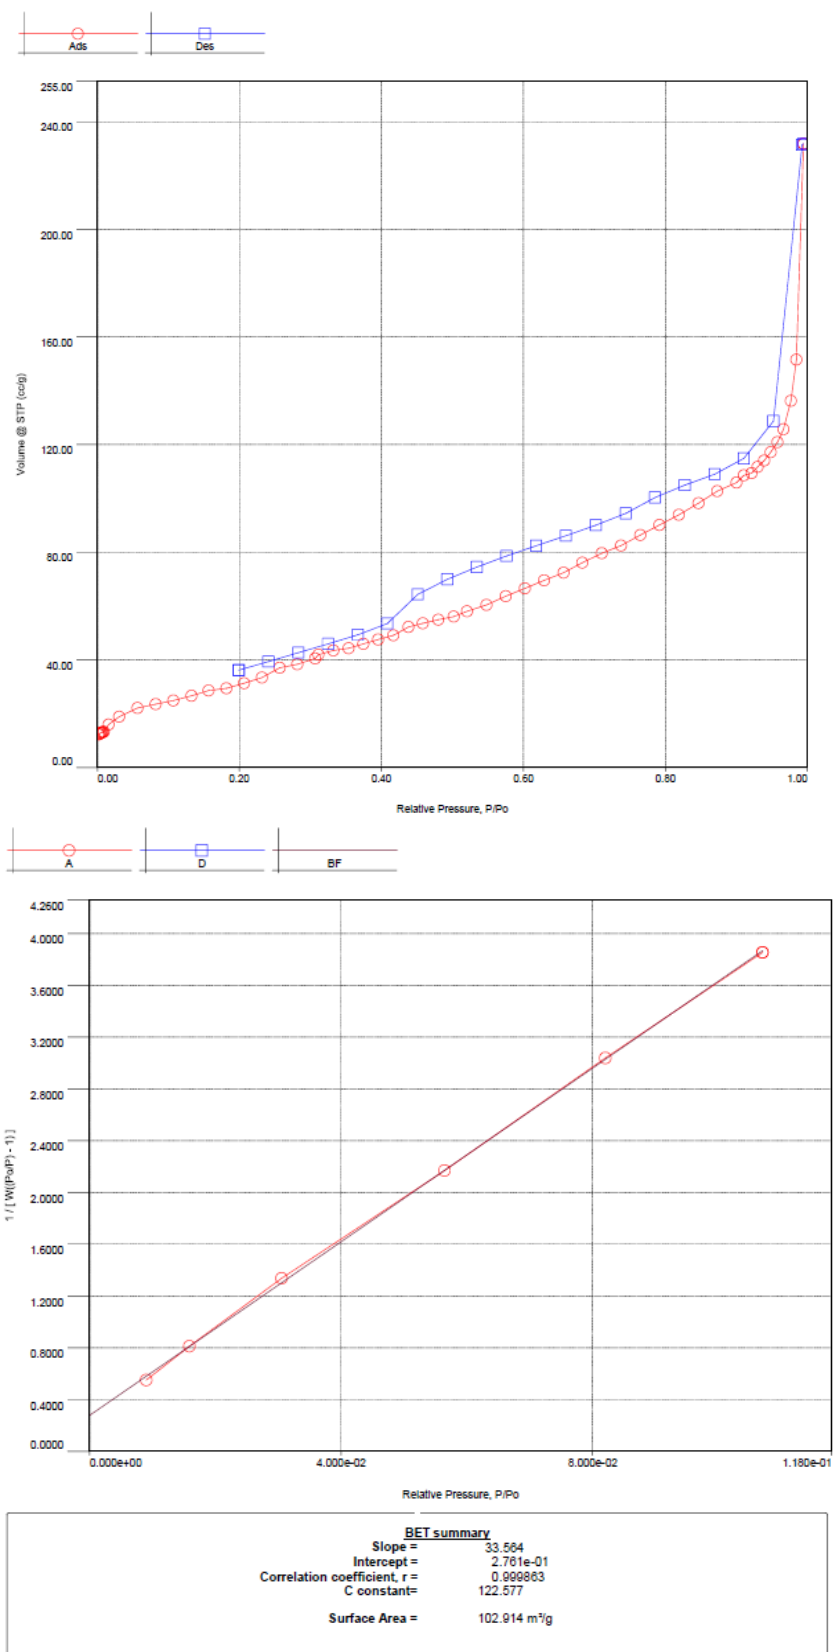

**Figure S7.** a) The isothermal histogram and, b) Multi-Point BET analysis based on the histogram of peptide 2 templated TiO<sub>2</sub> nanowire network.



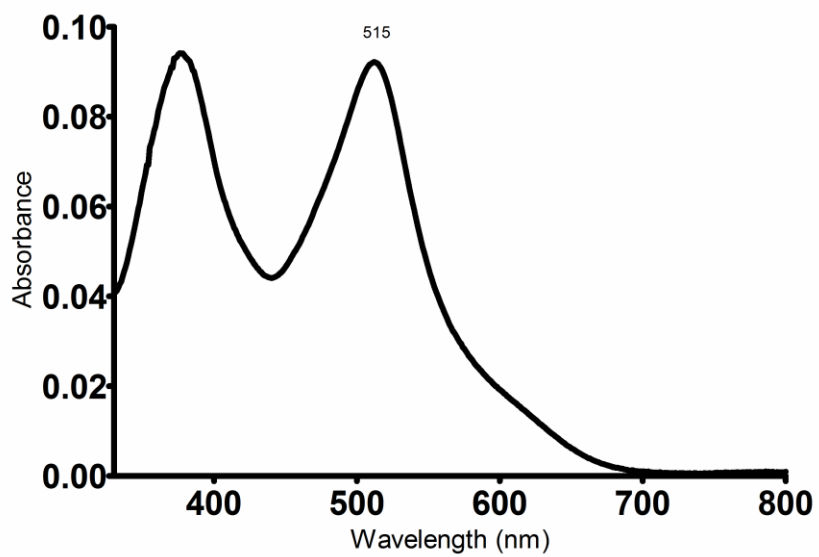

*Figure S8. UV-Vis absorption spectrum of N719 sensitizer dye.*

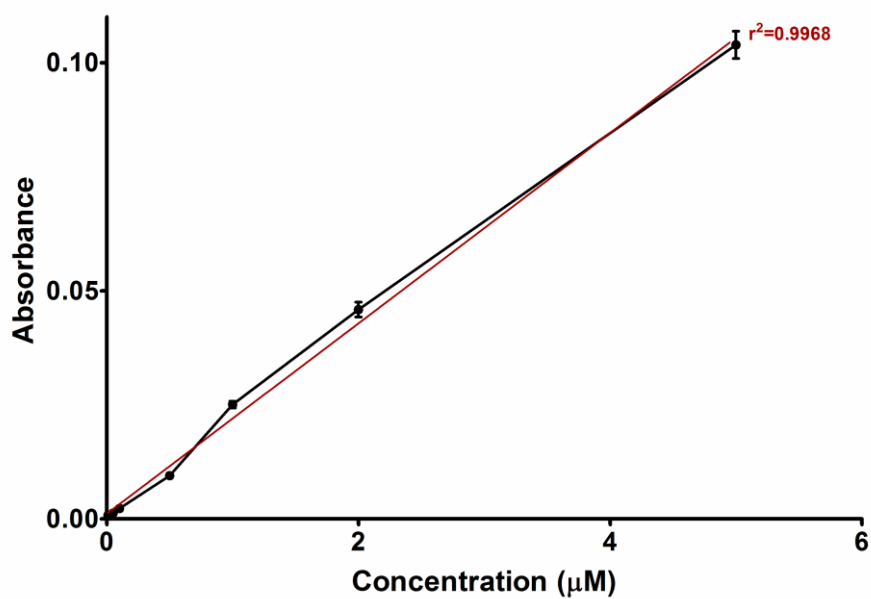

*Figure S9. Concentration and absorbance graph of N719.*

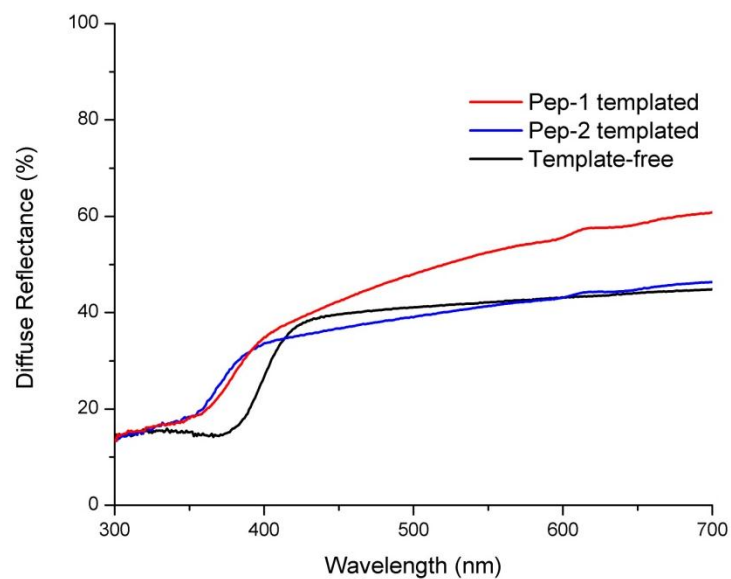

**Figure S 14.** Diffuse reflectance spectra of  $\text{TiO}_2$  materials.

**Table S1.** Relative efficiencies of different devices normalized to dye and titania amounts.

| Sample                                                                                 | Peptide-1 templated $\text{TiO}_2$ | Peptide-2 templated $\text{TiO}_2$ | Template-free $\text{TiO}_2$ |
|----------------------------------------------------------------------------------------|------------------------------------|------------------------------------|------------------------------|
| $\% \text{ Efficiency} / (\text{Conc}_{\text{Dye}} \times \text{Conc}_{\text{TiO}_2})$ | 3.59                               | 2.18                               | 1.00                         |
